# Supplementary material
Source: PubMed Central journal article supplement (PMC9243273)
Supplement: jcsm.9978.sm001.pdf [file jcsm.9978.sm001.pdf]

**Figure S1**—Inclusion criteria included for the study design.

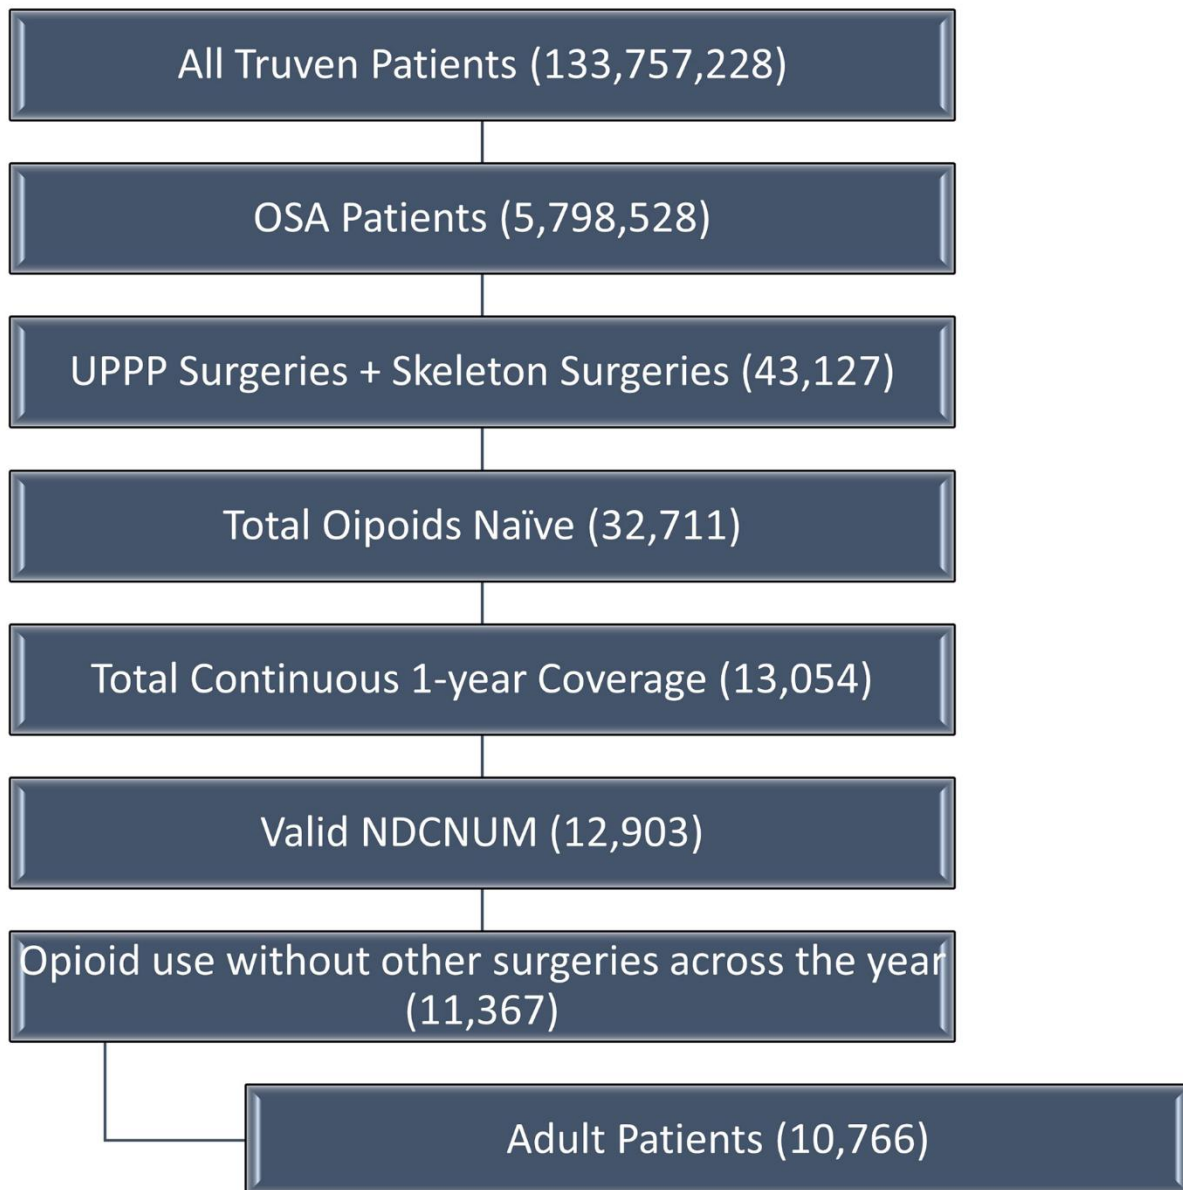

**Table S1:** ICD and CPT codes used.

| <b>Comorbidities</b>     | <b>ICD-9 Codes</b>                                                                                                                                                                                                                                                                                                                                                                                                                                                                                                                                                                                                                                                                                                                                                                                                                                                                                                                                                                                                                                                                                                                                                   |
|--------------------------|----------------------------------------------------------------------------------------------------------------------------------------------------------------------------------------------------------------------------------------------------------------------------------------------------------------------------------------------------------------------------------------------------------------------------------------------------------------------------------------------------------------------------------------------------------------------------------------------------------------------------------------------------------------------------------------------------------------------------------------------------------------------------------------------------------------------------------------------------------------------------------------------------------------------------------------------------------------------------------------------------------------------------------------------------------------------------------------------------------------------------------------------------------------------|
| OSA                      | 327.20, 327.23, 327.29, 780.51, 780.53, 780.57                                                                                                                                                                                                                                                                                                                                                                                                                                                                                                                                                                                                                                                                                                                                                                                                                                                                                                                                                                                                                                                                                                                       |
| Tobacco use              | 305.1, 994.06, 994.07, V1582, G0436                                                                                                                                                                                                                                                                                                                                                                                                                                                                                                                                                                                                                                                                                                                                                                                                                                                                                                                                                                                                                                                                                                                                  |
| Diabetes                 | V58.67, 250.0, 250.00, 250.02, 250.1, 250.10, 250.11, 250.12, 250.13, 250.4, 250.40, 250.41, 250.42, 250.43, 250.5, 250.50, 250.51, 250.52, 250.53, 250.6, 250.60, 250.61, 250.62, 250.63, 250.7, 250.70, 250.71, 250.72, 250.73, 250.9, 250.90, 250.91, 250.92, 250.93, 583.81, 362.0                                                                                                                                                                                                                                                                                                                                                                                                                                                                                                                                                                                                                                                                                                                                                                                                                                                                               |
| Hypertension             | 401.1, 401.9, 402.x                                                                                                                                                                                                                                                                                                                                                                                                                                                                                                                                                                                                                                                                                                                                                                                                                                                                                                                                                                                                                                                                                                                                                  |
| Autoimmune disease       | 135, 245.2, 279.49, 283.0, 446.4, 571.6, 579.0, 696.0, 710.0, 710.1, 710.2, 710.3, 710.9, 711.90, 712.19, 714.0, 714.30, 720.0, 725, 729.1, 795.79, G8859, G8860                                                                                                                                                                                                                                                                                                                                                                                                                                                                                                                                                                                                                                                                                                                                                                                                                                                                                                                                                                                                     |
| Immune Deficiency        | V58.65, 042, 279.0, 279.1, 279.2, 279.3, 279.4, 279.5, 279.8, 279.9, 279.00, 279.01, 279.02, 279.03, 279.04, 279.05, 279.06, 279.09, 279.10, 279.11, 279.12, 279.13, 279.19, 279.41, 279.49, 279.50, 279.51, 279.52, 279.53, 203.0, 203.1, 203.8, 203.00, 203.01, 203.02, 203.10, 203.11, 203.12, 203.80, 203.81, 203.82, 204.0, 204.1, 204.2, 204.8, 204.9, 204.00, 204.01, 204.02, 204.10, 204.11, 204.12, 204.20, 204.21, 204.22, 204.80, 204.81, 204.82, 204.90, 204.91, 204.92, 205.0, 205.1, 205.2, 205.3, 205.8, 205.9, 205.00, 205.01, 205.02, 205.10, 205.11, 205.12, 205.20, 205.21, 205.22, 205.30, 205.31, 205.32, 205.80, 205.81, 205.82, 205.90, 205.91, 205.92, 206.0, 206.1, 206.2, 206.8, 206.9, 206.00, 206.01, 206.02, 206.10, 206.11, 206.12, 206.20, 206.21, 206.80, 206.81, 206.82, 206.90, 206.91, 206.92, 207.0, 207.2, 207.8, 207.00, 207.01, 207.10, 207.11, 207.12, 207.20, 207.21, 207.22, 207.80, 207.81, 207.82, 282.60, 282.61, 288.0, 288.1, 288.2, 288.3, 288.4, 288.5, 288.6, 288.8, 288.9, 288.00, 288.01, 288.02, 288.03, 288.04, 288.09, 288.50, 288.51, 288.59, 288.60, 288.61, 288.62, 288.63, 288.64, 288.65, 288.66, 288.69 |
| Depression               | 29620, 29621, 29622, 29623, 29624, 29625, 29626, 29627, 29628, 29629, 29630, 29631, 29632, 29633, 29634, 29635, 29636, 29637, 29638, 29639                                                                                                                                                                                                                                                                                                                                                                                                                                                                                                                                                                                                                                                                                                                                                                                                                                                                                                                                                                                                                           |
| Other mood disorders     | 2969, 29690, 29699                                                                                                                                                                                                                                                                                                                                                                                                                                                                                                                                                                                                                                                                                                                                                                                                                                                                                                                                                                                                                                                                                                                                                   |
| Opioid dependence        | 30400, 30401, 30402, 3055, 30550, 30551, 30552, 30553                                                                                                                                                                                                                                                                                                                                                                                                                                                                                                                                                                                                                                                                                                                                                                                                                                                                                                                                                                                                                                                                                                                |
| Substance dependence     | 3049, 30490, 30491, 30492, 30493, 3056, 30560, 30561, 30562, 30563, 30564, 30565, 30566, 30567, 30568, 30569, 30570, 30571, 30572, 30573, 30574, 30575, 30576, 30577, 30578, 30579, 30580, 30581, 30582, 30583, 30584, 30585, 30586, 30587, 30588, 30589                                                                                                                                                                                                                                                                                                                                                                                                                                                                                                                                                                                                                                                                                                                                                                                                                                                                                                             |
| Schizophrenia            | 29500, 29501, 29502, 29503, 29504, 29505, 29506, 29507, 29508, 29509, 29510, 29511, 29512, 29513, 29514, 29515, 29516, 29517, 29518, 29519, 29520, 29521, 29522, 29523, 29524, 29525, 29526, 29527, 29528, 29529, 29530, 29531, 29532, 29533, 29534, 29535, 29536, 29537, 29538, 29539, 29540, 29541, 29542, 29543, 29544, 29545, 29546, 29547, 29548, 29549, 29550, 29551, 29552, 29553, 29554, 29555, 29556, 29557, 29558, 29559, 29560, 29561, 29562, 29563, 29564, 29565, 29566, 29567, 29568, 29569, 29570, 29571, 29572, 29573, 29574, 29575, 29576, 29577, 29578, 29579, 29580, 29581, 29582, 29583, 29584, 29585, 29586, 29587, 29588, 29589, 29590, 29591, 29592, 29593, 29594, 29595, 29596, 29597, 29598, 29599                                                                                                                                                                                                                                                                                                                                                                                                                                           |
| <b>Sleep Surgery</b>     | <b>CPT Codes</b>                                                                                                                                                                                                                                                                                                                                                                                                                                                                                                                                                                                                                                                                                                                                                                                                                                                                                                                                                                                                                                                                                                                                                     |
| UPPP                     | Excision and Destruction Procedures on the Palate and Uvula: 42125<br>Excision and Destruction Procedures on the Pharynx, Adenoids, and Tonsils: 42826                                                                                                                                                                                                                                                                                                                                                                                                                                                                                                                                                                                                                                                                                                                                                                                                                                                                                                                                                                                                               |
| Nasal procedures         | Submucous resection: 30140/30802<br>Septoplasty: 30520                                                                                                                                                                                                                                                                                                                                                                                                                                                                                                                                                                                                                                                                                                                                                                                                                                                                                                                                                                                                                                                                                                               |
| Tongue base procedures   | lingual tonsillectomy: 42870<br>partial glossectomy: 41120                                                                                                                                                                                                                                                                                                                                                                                                                                                                                                                                                                                                                                                                                                                                                                                                                                                                                                                                                                                                                                                                                                           |
| Genioglossus advancement | Segmental mandible osteotomy with genioglossus advancement: 21199                                                                                                                                                                                                                                                                                                                                                                                                                                                                                                                                                                                                                                                                                                                                                                                                                                                                                                                                                                                                                                                                                                    |
| Skeletal surgery         | 21110 maxillomandibular fixation                                                                                                                                                                                                                                                                                                                                                                                                                                                                                                                                                                                                                                                                                                                                                                                                                                                                                                                                                                                                                                                                                                                                     |

|                      |                                                                                                            |
|----------------------|------------------------------------------------------------------------------------------------------------|
|                      | 21141: leFort 1 reconstruction<br>21145: leFort 1 advancement<br>21196: bilateral sagittal split osteotomy |
| <b>Complications</b> | <b>ICD-9 Codes</b>                                                                                         |
| Bleeding             | 998.11, 998.12, 998.13, 78.47                                                                              |
| Intubation           | 31500                                                                                                      |
| Tracheostomy         | 31600, 31601, 31603                                                                                        |

**Table S2.** Clarifying various terms and outcomes based on time interval of opioid use.

| <b>Time interval</b><br><b>Categories (number)</b>                                                      | <b>0 - 3<br/>months<br/>opioid<br/>prescription</b> | <b>3 - 6 months<br/>opioid<br/>prescription</b> | <b>6 - 12 months<br/>opioid<br/>prescription</b> | <b>Total # of<br/>Surgeries</b> |
|---------------------------------------------------------------------------------------------------------|-----------------------------------------------------|-------------------------------------------------|--------------------------------------------------|---------------------------------|
| Opioid prescription after naive period                                                                  | 5,702                                               |                                                 |                                                  | 5,702                           |
| First opioid prescription at 3 to 6 months                                                              |                                                     | 20                                              |                                                  | 20                              |
| Persistent opioid prescription                                                                          | 301                                                 |                                                 |                                                  | 301                             |
| First opioid prescription at 6 to 12 months                                                             |                                                     |                                                 | 71                                               | 71                              |
| Non-continuous Prolonged opioid prescription                                                            | 687                                                 |                                                 | 687                                              | 687                             |
| Continuous Prolonged opioid prescription                                                                | 115                                                 |                                                 |                                                  | 115                             |
| First opioid prescription at 3 months to a year                                                         |                                                     | 10                                              |                                                  | 10                              |
| <b>Total</b>                                                                                            | <b>6,805</b>                                        | <b>446</b>                                      | <b>883</b>                                       | <b>6,906</b>                    |
| <b>This total number is greater than that of surgeries as one surgery can be counted more than once</b> | <b>8,134</b>                                        |                                                 |                                                  |                                 |

**Table S3:** The univariate analysis for complications and outcomes. Green shows factors with a p-value <0.05.

| Independent Variables | Inappropriate Opioid Use | 3 – 6 months Opioid Use | 6 – 12 months Opioid Use | Continuous Persistent Opioid Use | Non-Continuous Prolonged Opioid Use | Continuous Prolonged Opioid Use | 1ry Bleed | Hosp. Readmission | Intubation |
|-----------------------|--------------------------|-------------------------|--------------------------|----------------------------------|-------------------------------------|---------------------------------|-----------|-------------------|------------|
| Autoimmune dse        | 0.021                    | 0.658                   | 0.243                    | 0.650                            | 0.717                               | 0.290                           | 0.994     | 0.591             | 0.222      |
| Depression            | 0.035                    | 0.749                   | 0.024                    | 0.986                            | 0.257                               | 0.383                           | 0.300     | 0.045             | 0.994      |
| Diabetes              | 0.004                    | 0.340                   | 0.010                    | 0.209                            | 0.260                               | 0.275                           | 0.544     | 0.023             | 0.994      |
| Hypertension          | 0.014                    | 0.064                   | 0.656                    | 0.178                            | 0.763                               | 0.886                           | 0.872     | 0.000             | 0.390      |
| Immune Deficiency     | 0.044                    | 0.589                   | 0.756                    | 0.488                            | 0.748                               | 0.763                           | 0.353     | 0.001             | 0.993      |
| Male gender           | 0.515                    | 0.639                   | 0.001                    | 0.944                            | 0.083                               | 0.103                           | 0.000     | 0.931             | 0.992      |
| Mood Disorder         | 0.026                    | 0.585                   | 0.941                    | 0.349                            | 0.541                               | 0.209                           | 0.122     | 0.035             | 0.993      |
| Opioid Dependence     | 0.055                    | 0.702                   | 0.025                    | 0.654                            | 0.651                               | 0.003                           | 0.979     | 0.398             | 0.000      |
| Periop. Opioid        | 0.000                    | 0.000                   | 0.000                    | 0.000                            | 0.000                               | 0.000                           | 0.000     | 0.614             | 0.883      |
| Schizophrenia         | 0.726                    | 0.702                   | 0.508                    | 0.654                            | 0.692                               | 0.981                           | 0.950     | 0.950             | 0.996      |
| Smoking               | 0.129                    | 0.550                   | 0.534                    | 0.340                            | 0.983                               | 0.052                           | 0.041     | 0.005             | 0.993      |
| Substance Dependence  | 0.111                    | 0.966                   | 0.583                    | 0.966                            | 0.827                               | 0.212                           | 0.891     | 0.142             | 0.000      |
| AGE                   | 0.014                    | 0.581                   | 0.071                    | 0.637                            | 0.383                               | 0.374                           | 0.000     | 0.000             | 0.399      |
| UPPP Alone            | 0.684                    | 0.922                   | 0.634                    | 0.991                            | 0.640                               | 0.505                           | 0.000     | 0.000             | 0.692      |
| UPPP Multilevel       | 0.086                    | 0.923                   | 0.859                    | 0.868                            | 0.202                               | 0.581                           | 0.005     | 0.000             | 0.542      |
| Skeletal Surgery      | 0.001                    | 0.613                   | 0.441                    | 0.644                            | 0.037                               | 0.770                           | 0.004     | 0.241             | 0.039      |

**Table S4.** Multivariate regression model showing factors associated with each complication with OR, 95% confidence interval and p value.

| Inappropriate Opioid Use     | Estimate | Std. Error | z value | P-value | 95% CI  |         |         | Interpretation  |                   |
|------------------------------|----------|------------|---------|---------|---------|---------|---------|-----------------|-------------------|
|                              |          |            |         |         | Min     | OR      | Max     | P Value         | OR                |
| (Intercept)                  | -5.6703  | 0.3157     | 17.9610 | <0.001  |         |         |         |                 |                   |
| Multilevel surgery with UPPP | -0.1876  | 0.2262     | -0.8290 | 0.4070  | 0.6611  | 0.8290  | 1.0394  | Not significant | No contribution   |
| Skeletal surgery             | -0.1586  | 0.1376     | -1.1530 | 0.2491  | 0.7436  | 0.8533  | 0.9792  | Not significant | Protection Factor |
| Age                          | -0.0002  | 0.0037     | -0.0430 | 0.9658  | 0.9962  | 0.9998  | 1.0035  | Not significant | No contribution   |
| Smoking                      | 0.3397   | 0.1415     | 2.4010  | 0.0164  | 1.2192  | 1.4045  | 1.6179  | Significant     | Risk factor       |
| Hypertension                 | -0.0267  | 0.0864     | -0.3080 | 0.7578  | 0.8931  | 0.9737  | 1.0616  | Not significant | No contribution   |
| Diabetes                     | -0.1574  | 0.1400     | -1.1240 | 0.2610  | 0.7427  | 0.8544  | 0.9828  | Not significant | Protection Factor |
| Autoimmune                   | -0.1123  | 0.1484     | -0.7570 | 0.4492  | 0.7705  | 0.8938  | 1.0367  | Not significant | No contribution   |
| Immune Deficiency            | -0.5398  | 0.2929     | -1.8430 | 0.0654  | 0.4349  | 0.5829  | 0.7813  | Not significant | Protection Factor |
| Depression                   | 0.2568   | 0.1461     | 1.7580  | 0.0788  | 1.1171  | 1.2927  | 1.4960  | Not significant | Risk factor       |
| Other Mood Disorders         | 0.4786   | 0.2892     | 1.6550  | 0.0979  | 1.2085  | 1.6138  | 2.1549  | Not significant | Risk factor       |
| Opioid Dependence            | 0.8364   | 0.6575     | 1.2720  | 0.2033  | 1.1959  | 2.3080  | 4.4544  | Not significant | Risk factor       |
| Substance Dependence         | 0.5309   | 0.6272     | 0.8460  | 0.3973  | 0.9082  | 1.7005  | 3.1839  | Not significant | No contribution   |
| Perioperative Opioid         | 3.4504   | 0.2623     | 13.1530 | <0.001  | 24.2427 | 31.5142 | 40.9667 | Significant     | Risk factor       |

| Continuous Persistent Opioid Use | Estimate | Std. Error | z value | P-value | 95% CI  |         |         | Interpretation |                 |
|----------------------------------|----------|------------|---------|---------|---------|---------|---------|----------------|-----------------|
|                                  |          |            |         |         | Min     | OR      | Max     | P Value        | OR              |
| (Intercept)                      | -6.8283  | 0.4523     | 15.0960 | <0.001  |         |         |         |                |                 |
| Hypertension                     | 0.3229   | 0.1216     | 2.6550  | 0.0079  | 1.2230  | 1.3811  | 1.5597  | Significant    | Risk factor     |
| Diabetes                         | -0.1615  | 0.2015     | -0.8010 | 0.4229  | 0.6956  | 0.8509  | 1.0408  | No significant | No contribution |
| Perioperative Opioid             | 3.6324   | 0.4516     | 8.0430  | <0.001  | 24.0660 | 37.8034 | 59.3825 | Significant    | Risk factor     |

| Continuous Prolonged Opioid Use | Estimate | Std. Error | z value | Pr(> z ) | 95% CI  |         |          | Interpretation |                 |
|---------------------------------|----------|------------|---------|----------|---------|---------|----------|----------------|-----------------|
|                                 |          |            |         |          | Min     | OR      | Max      | P Value        | OR              |
| (Intercept)                     | -8.5512  | 1.0035     | -8.5220 | <0.001   |         |         |          |                |                 |
| Male                            | 0.4382   | 0.2039     | 2.1490  | 0.0317   | 1.2639  | 1.5499  | 1.9005   | Significant    | Risk factor     |
| Smoking                         | 0.6656   | 0.2956     | 2.2520  | 0.0243   | 1.4478  | 1.9457  | 2.6149   | Significant    | Risk factor     |
| Mood Disorders                  | 0.4218   | 0.6194     | 0.6810  | 0.4959   | 0.8206  | 1.5247  | 2.8326   | No significant | No contribution |
| Opioid Dependence               | 2.0950   | 0.9023     | 2.3220  | 0.0202   | 3.2960  | 8.1254  | 20.0314  | Significant    | Risk factor     |
| Substance Dependence            | 0.0135   | 1.2593     | 0.0110  | 0.9915   | 0.2877  | 1.0136  | 3.5707   | No significant | No contribution |
| Perioperative Opioid            | 4.2906   | 1.0039     | 4.2740  | <0.001   | 26.7523 | 73.0066 | 199.2340 | Significant    | Risk factor     |

| Non-continuous Prolonged Opioid Use | Estimate | Std. Error | z value | Pr(> z ) | 95% CI  |         |         | Interpretation |                 |
|-------------------------------------|----------|------------|---------|----------|---------|---------|---------|----------------|-----------------|
|                                     |          |            |         |          | Min     | OR      | Max     | P Value        | OR              |
| (Intercept)                         | -6.2567  | 0.3614     | 17.3110 | <0.001   |         |         |         |                |                 |
| Multilevel Surgery                  | 0.1576   | 0.1933     | 0.8150  | 0.4149   | 0.9649  | 1.1707  | 1.4203  | No significant | No contribution |
| Skeletal Surgery                    | 0.0365   | 0.1206     | 0.3020  | 0.7625   | 0.9193  | 1.0371  | 1.1700  | No significant | No contribution |
| Male                                | 0.2717   | 0.0912     | 2.9790  | 0.0029   | 1.1978  | 1.3122  | 1.4376  | Significant    | Risk factor     |
| Perioperative Opioid                | 4.0572   | 0.3565     | 11.3810 | <0.001   | 40.4752 | 57.8111 | 82.5719 | Significant    | Risk factor     |

| Bleeding           | Estimate | Std. Error | z value | Pr(> z ) | 95% CI |        |        | Interpretation |                   |
|--------------------|----------|------------|---------|----------|--------|--------|--------|----------------|-------------------|
|                    |          |            |         |          | Min    | OR     | Max    | P Value        | OR                |
| (Intercept)        | -1.6182  | 0.2400     | -6.7430 | <0.001   |        |        |        |                |                   |
| Multilevel Surgery | -0.9653  | 0.3233     | -2.9860 | 0.0028   | 0.2757 | 0.3809 | 0.5262 | Significant    | Protection Factor |
| Skeletal Surgery   | -0.3469  | 0.1957     | -1.7730 | 0.0763   | 0.5812 | 0.7069 | 0.8597 | No significant | Protection Factor |
| AGE                | -0.0365  | 0.0043     | -8.4040 | <0.001   | 0.9599 | 0.9641 | 0.9683 | Significant    | Protection Factor |
| Male               | -0.5901  | 0.1322     | -4.4650 | <0.001   | 0.4857 | 0.5543 | 0.6326 | Significant    | Protection Factor |

|                      |         |        |         |        |        |        |        |                |                   |
|----------------------|---------|--------|---------|--------|--------|--------|--------|----------------|-------------------|
| Smoking              | 0.2504  | 0.1631 | 1.5350  | 0.1248 | 1.0912 | 1.2845 | 1.5121 | No significant | Risk factor       |
| Mood Disorders       | -1.2725 | 0.7174 | -1.7740 | 0.0761 | 0.1367 | 0.2801 | 0.5740 | No significant | Protection Factor |
| Perioperative Opioid | -0.4959 | 0.0974 | -5.0890 | <0.001 | 0.5525 | 0.6090 | 0.6713 | Significant    | Protection Factor |

| Hospital readmission | Estimate | Std. Error | z value | Pr(> z ) | 95% CI |        |        | Interpretation  |                   |
|----------------------|----------|------------|---------|----------|--------|--------|--------|-----------------|-------------------|
|                      |          |            |         |          | Min    | OR     | Max    | P Value         | OR                |
| (Intercept)          | -3.5531  | 0.2043     | 17.3940 | <0.001   |        |        |        |                 |                   |
| Multilevel Surgery   | 0.4157   | 0.1584     | 2.6250  | 0.0087   | 1.2935 | 1.5155 | 1.7756 | Significant     | Risk factor       |
| Skeletal Surgery     | -0.2526  | 0.1019     | -2.4780 | 0.0132   | 0.7015 | 0.7768 | 0.8601 | Significant     | Protection Factor |
| AGE                  | 0.0068   | 0.0043     | 1.5750  | 0.1152   | 1.0025 | 1.0068 | 1.0111 | Not significant | Risk factor       |
| Smoking              | 0.3952   | 0.1493     | 2.6480  | 0.0081   | 1.2788 | 1.4847 | 1.7237 | Significant     | Risk factor       |
| Other Mood Disorders | 0.5738   | 0.3155     | 1.8190  | 0.0689   | 1.2948 | 1.7751 | 2.4335 | Not significant | Risk factor       |
| Depression           | 0.2643   | 0.1645     | 1.6060  | 0.1082   | 1.1049 | 1.3025 | 1.5355 | Not significant | Risk factor       |
| Diabetes             | 0.0618   | 0.1307     | 0.4730  | 0.6363   | 0.9334 | 1.0638 | 1.2124 | Not significant | No contribution   |
| Hypertension         | 0.4406   | 0.0975     | 4.5200  | <0.001   | 1.4094 | 1.5537 | 1.7128 | Significant     | Risk factor       |
| Immune Deficiency    | 0.5657   | 0.2054     | 2.7540  | 0.0059   | 1.4338 | 1.7608 | 2.1623 | Significant     | Risk factor       |

| opioid use after 6 – 12 months | Estimate | Std. Error | z value | Pr(> z ) | 95% CI |        |        | Interpretation  |             |
|--------------------------------|----------|------------|---------|----------|--------|--------|--------|-----------------|-------------|
|                                |          |            |         |          | Min    | OR     | Max    | P Value         | OR          |
| (Intercept)                    | -4.4891  | 0.1846     | 24.3220 | <0.001   |        |        |        |                 |             |
| AGE                            | 0.0084   | 0.0032     | 2.6270  | 0.0086   | 1.0052 | 1.0084 | 1.0117 | Significant     | Risk factor |
| Male                           | 0.3025   | 0.0804     | 3.7650  | 0.0002   | 1.2488 | 1.3533 | 1.4665 | Significant     | Risk factor |
| Depression                     | 0.2297   | 0.1322     | 1.7380  | 0.0823   | 1.1024 | 1.2582 | 1.4360 | Not significant | Risk factor |
| Diabetes                       | 0.3588   | 0.1043     | 3.4390  | <0.001   | 1.2898 | 1.4316 | 1.5891 | Significant     | Risk factor |
| Autoimmune                     | 0.2332   | 0.1169     | 1.9950  | 0.0460   | 1.1233 | 1.2626 | 1.4192 | Significant     | Risk factor |
| Opioid Dependence              | 1.1905   | 0.5427     | 2.1930  | 0.0283   | 1.9112 | 3.2886 | 5.6587 | Significant     | Risk factor |
| Perioperative Opioid           | 1.9679   | 0.1194     | 16.4740 | <0.001   | 6.3497 | 7.1553 | 8.0631 | Significant     | Risk factor |

| opioid use after 3 – 6 months | Estimate | Std. Error | z value | Pr(> z ) | 95% CI |        |         | Interpretation |             |
|-------------------------------|----------|------------|---------|----------|--------|--------|---------|----------------|-------------|
|                               |          |            |         |          | Min    | OR     | Max     | P Value        | OR          |
| (Intercept)                   | -5.4715  | 0.2329     | 23.4970 | <0.001   |        |        |         |                |             |
| Hypertension                  | 0.3355   | 0.1147     | 2.9260  | 0.0034   | 1.2471 | 1.3986 | 1.5686  | Significant    | Risk factor |
| Perioperative Opioid          | 2.2702   | 0.2321     | 9.7820  | <0.001   | 7.6760 | 9.6813 | 12.2105 | Significant    | Risk factor |
